# Supplementary material for: A Propensity Score-Matched Cohort Study to Evaluate the Association of Lymph Node Retrieval with Long-Term Overall Survival in Patients with Esophageal Cancer
Source: Springer Nature journal article supplement (doi:10.1245/s10434-020-09142-w), 2020-10-16
Supplement: MOESM1 [file 18493202]

Supplementary figures

Overall survival of patients with esophageal cancer who underwent curative surgery between 2011-2016  
By number of lymph nodes

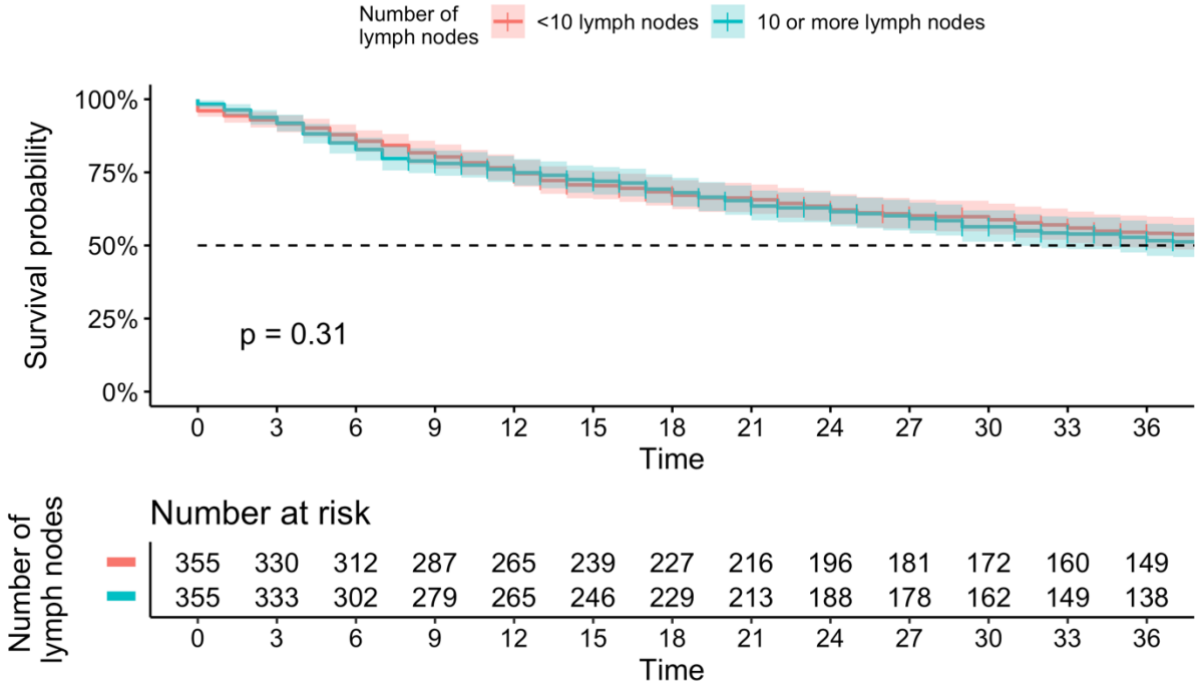

Supplementary figure 1: Overall survival curves with 95% confidence interval of the subgroups  $\geq 10$  LNs versus  $< 10$  LNs in the propensity matched cohort.

Overall survival of patients with esophageal cancer who underwent curative surgery between 2011-2016  
By number of lymph nodes

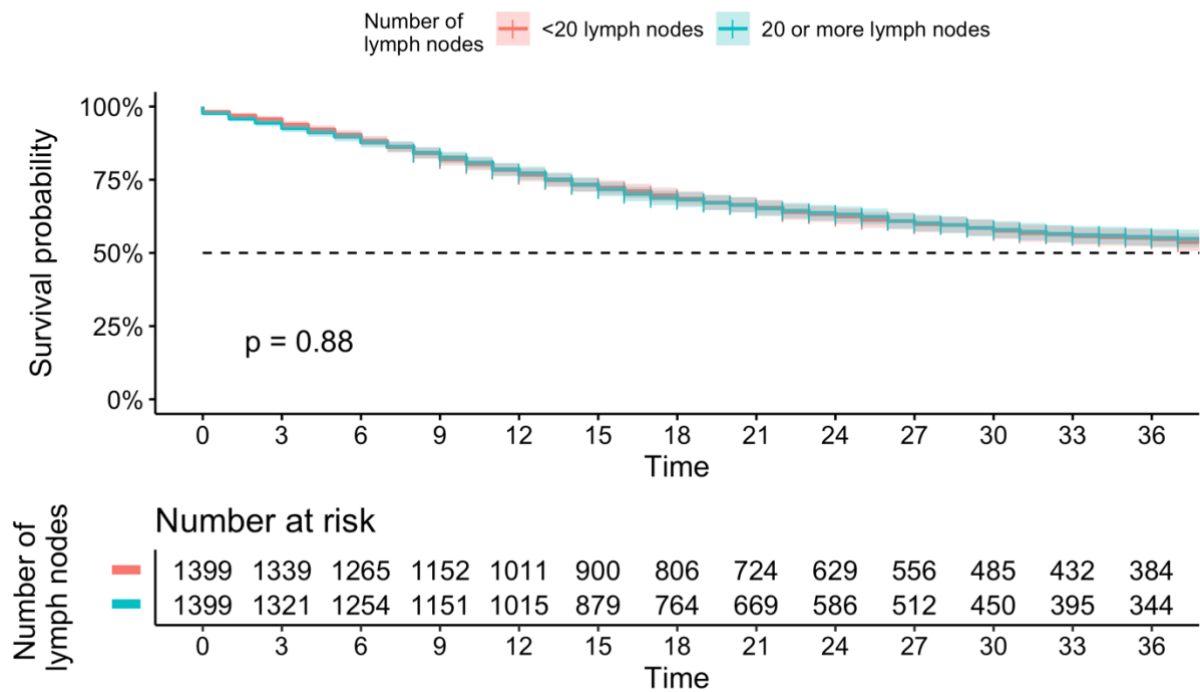

Supplementary figure 2: Overall survival curves with 95% confidence interval of the subgroups  $\geq 20$  LNs versus  $< 20$  LNs in the propensity matched cohort.

Overall survival of patients with esophageal cancer who underwent curative surgery between 2011-2016  
By number of lymph nodes

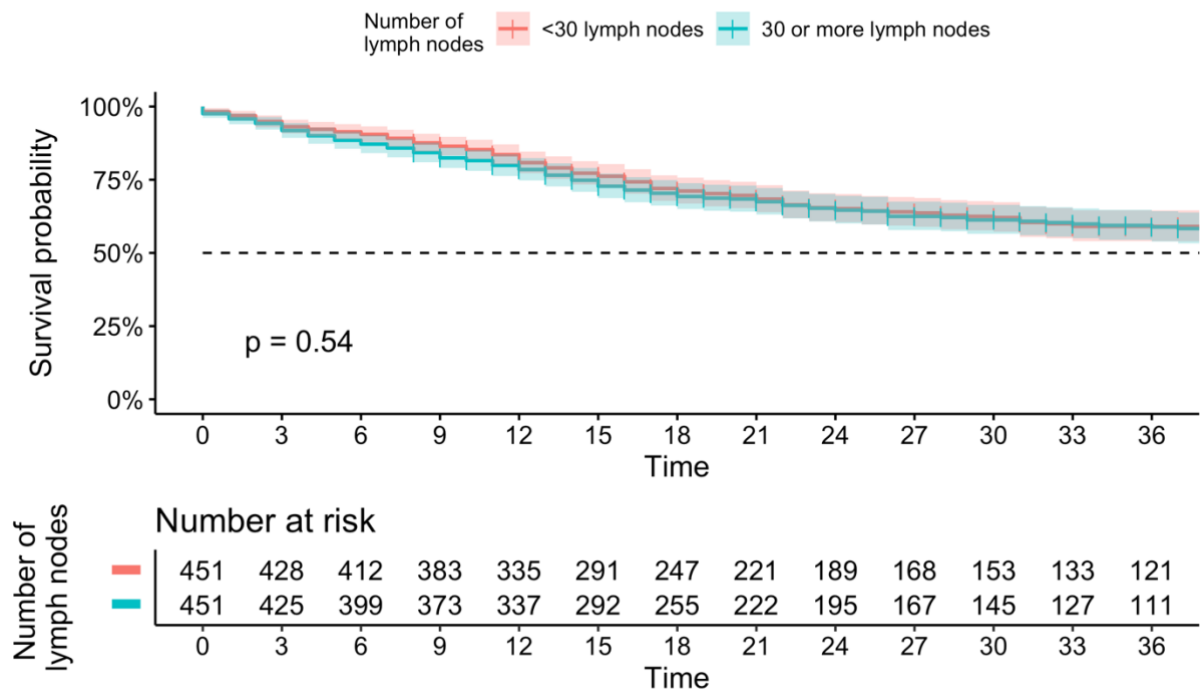

Supplementary figure 3: Overall survival curves with 95% confidence interval of the subgroups  $\geq 30$  LNs versus  $< 30$  LNs in the propensity matched cohort.
